# Supplementary material for: Mechanisms of Cardiovascular Protection Associated with Intermittent Hypobaric Hypoxia Exposure in a Rat Model: Role of Oxidative Stress
Source: PubMed Central journal article supplement (PMC5855588; doi:10.3390/ijms19020366), 2018-01-26
Supplement: ijms-19-00366-s001.pdf [file ijms-19-00366-s001.pdf]

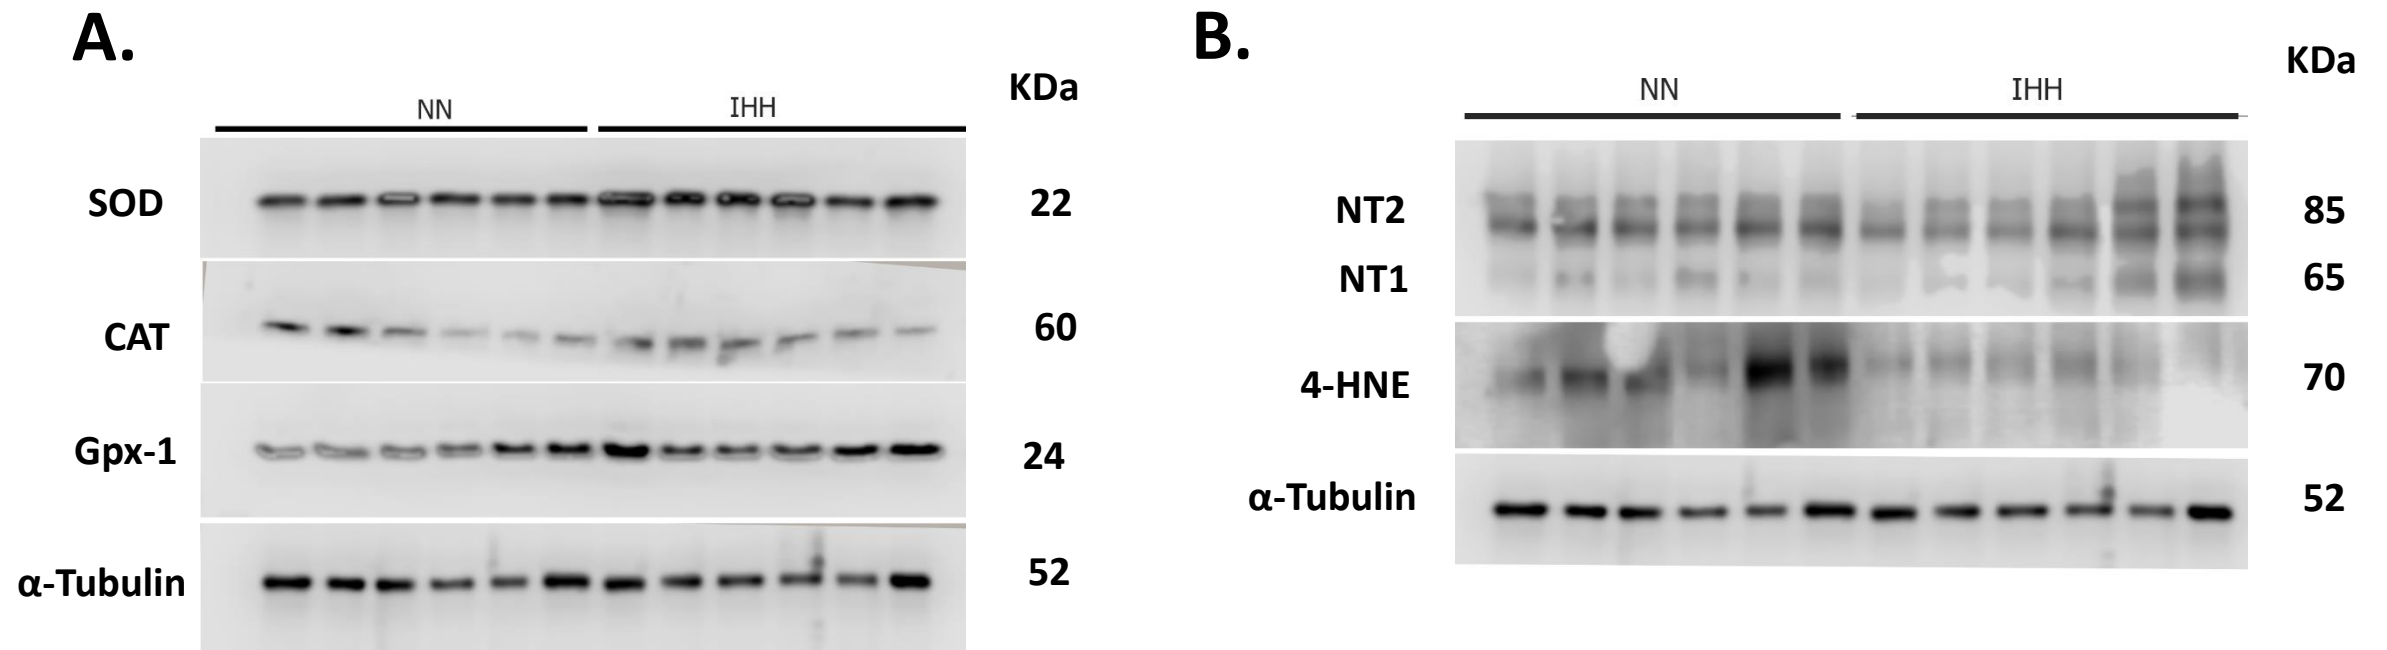

**Supplementary Figure 1.** Representative figures of Western Blots for the antioxidant enzymes superoxide dismutase (SOD), glutathione peroxidase (GPx) and catalase (CAT) (A), and for the oxidative stress markers nitrotyrosine-1 (NT1), nitrotyrosine-2(NT2), and 4 Hydroxynonenal (4 HNE) (B).
